# Supplementary material
Source: publisher figshare collection journal article supplement (https://karger.figshare.com/ndownloader/files/14107841)
Supplement: Supplementary file 1 [file 14107841]

**Table e-4**

**PD Patient ILS Response**

| **Patient**  **No.** |  | **Settings prior to ILS*** |  | **ILS settings*** |  | **ILS contact: location (X,Y,Z: MCP)** |
| --- | --- | --- | --- | --- | --- | --- |
| PD4 |  | R: C+2-/3.3/60/130    L: C+9-/2.9/60/130 |  | R:C+1-/3.2/60/125  **L:C+9-/3.3/60/125; C+11-/ 0.5/ 60/125** |  | 9:STN (-13,10,1)  11:rZI  (-15,7,-5) |
| PD7 |  | R: C+2-/2.8/60/185  L: C+7-/3.2/90/185 |  | **R:C+0-3-/1.5/60/120;**  **C+2-/2.8/60/120**  L: C+7-/3.5/90/120 |  | 3:rZI (14,0,2) |
| PD8 |  | R: C+3-/3/60/250  L: C+11-/3/60/250 |  | R:C+2-/3.6/60/125  **L:C+10-/2.2/60/125;**  **C+11-/3.5/60/125** |  | 10:STN (-12,2,-3)  11:rZI  (-13,0,-5) |
| PD9 |  | R: C+1-3-/3.1/60/180  L: C+9-/2.8/60/180 |  | **R:C+1-/3.8/60/125;**  **C+3-/1.5/60/125**  L: C+9-/3.5/60/125 |  | 1:STN  (13,2,2)  3:rZI  (15,-2,-4) |
| PD10 |  | R: 3+2-/3.5/60/130  L: C+11-/3/60/130 |  | **R:C+2-/2.2/60/125;**  **C+3-/3.5/60/125**  L:C+11-3.5/60/125 |  | 2:STN  (14,1,2)  3:rZI  (12,-1,-1) |
| PD11 |  | R: C+1-/2.1/60/130  L: C+9-/4.1/60/130 |  | **R:C+1-/2.1/60/125; C+3-/1.5/60/125**  L:C+9-/4/60/125 |  | 1:STN  (14,3,5)  3:rZI  (15,0,-1) |
| PD13 |  | R: C+1-/3.3/60/145  L: C+0-/5/60/100 |  | **R:C+1-/3.5/60/125; C+3-/1.5/60/125**  L:C+0-/5/60/100 |  | 1:STN  (19,5,4)  3:rZI  (21,0,-3) |
| PD21 |  | R: C+1-/3.6/60/130  L: C+11-/4/60/130 |  | R:C+1-/3.6/60/125  **L:C+8-/1.7/60/125; C+11-/4/60/125** |  | 8:STN  (-11,7,11)  11:rZI  (--13,-1,1) |
| PD22 |  | R: C+11-/2.5/60/130  L: C+2-/2.1/60/130 |  | R:C+11-/2.6/60/125  **L:C+3-/3.1/60/125; C+0-/3.1/60/125** |  | N/A |
| PD23 |  | R: C+0-/4.45/60/130  L: C+10-/2.1/60/130 |  | **R:C+0-/5.05/60/80; C+3-/1.5/60/80**  L:C+10-/2.15/60/80 |  | 0: out of STN  (5,8,8)  3:rZI  (7,3,-1) |
| PD24 |  | R: C+2-/2.5/60/130  L: C+9-11-/2/60/130 |  | R:C+2-/2.7/60/125  **L:C+10-/2.5/60/125; C+11-/0.6/60/125** |  | 10:STN  (-13, 3, -1)  11:rZI  (-14,1,-4) |
| PD25 |  | L: C+1-/2.5/60/130 |  | **L:C+1-/3.5/60/80;**  **C+2-/2/60/80** |  | 1:STN  (-10,6,6)  2:STN  (-11,4,3) |

Legend: Interleaving stimulation was used on one side only in all patients except in two cases (PD15, PD16). Interleaving stimulation is in BOLD type.

Abbreviations: *contacts/voltage (volts) /pulse width (μs)/frequency (Hz). AE: adverse effect; C: case; DBS; deep brain stimulation; ILS: interleaving stimulation; L: left; MCP: midcommissural point; N/A: not available; PD: Parkinson’s disease; R: right; rZI: rostral zona incerta; SNr: substantia nigra pars reticulata; STN: subthalamic nucleus; UPDRS III: Unified Parkinson’s disease rating scale part III.
